# Supplementary material for: Molecular Epidemiology and Presence of Hybrid Pathogenic Escherichia coli among Isolates from Community-Acquired Urinary Tract Infection
Source: MDPI journal article supplement (doi:10.3390/microorganisms10020302), 2022-01-27
Supplement: s1 [file s1]

## Supplemental material

# Molecular epidemiology and presence of hybrid pathogenic *Escherichia coli* among isolates from community-acquired urinary tract infection

Júlia A. S. Nascimento<sup>1</sup>, Fernanda F. Santos <sup>2</sup>, José F. Santos-Neto<sup>1</sup>, Liana O. Trovão<sup>1</sup>, Tiago B. Valiatti<sup>2</sup>, Isabel C. Pinaffi <sup>3</sup>, Mônica A. M. Vieira<sup>1</sup>, Rosa M. Silva<sup>4</sup>, Ivan N. Falsetti <sup>3</sup>, Ana C. M. Santos<sup>1</sup>, Tânia A. T. Gomes <sup>1\*</sup>

**Table S1 Primers and conditions used for phylogenetic classification <sup>a</sup>.**

| Reaction             | Primers designation | Primers (5' – 3')        | Cycles                                                            | Amplicon (bp) |
|----------------------|---------------------|--------------------------|-------------------------------------------------------------------|---------------|
| Multiplex            | chuA.1b             | ATGGTACCGGACGAACCAAC     | 94 °C – 4 min; 30 × (94 °C – 5 s and 59 °C – 20 s); 72 °C – 5 min | 288           |
|                      | chuA.2              | TGCCGCCAGTACCAAAGACA     |                                                                   |               |
|                      | yjaA.1b             | CAAACGTGAAGTGTCAGGAG     |                                                                   | 211           |
|                      | yjaA.2b             | AATGCGTTCCTCAACCTGTG     |                                                                   |               |
|                      | TspE4C2.1b          | CACTATTCGTAAGGTCATCC     |                                                                   | 152           |
|                      | TspE4C2.2b          | AGTTTATCGCTGCGGGTCGC     |                                                                   |               |
|                      | AceK.f              | AACGCTATTCGCCAGCTTGC     |                                                                   | 400           |
| phylogroup E         | ArpA1.r             | TCTCCCCATACCGTACGCTA     | 94 °C – 4 min; 30 × (94 °C – 5 s and 57 °C – 20 s); 72 °C – 5 min | 301           |
|                      | ArpAgpE.f           | GATTCCATCTTGTCAAAATATGCC |                                                                   |               |
| phylogroup C         | ArpAgpE.r           | GAAAAGAAAAAGAATTCCCAAGAG | 94 °C – 4 min; 30 × (94 °C – 5 s and 59 °C – 20 s); 72 °C – 5 min | 219           |
|                      | trpAgpC.1           | AGTTTTATGCCCAGTGCGAG     |                                                                   |               |
| Control <sup>b</sup> | trpAgpC.2           | TCTGCGCCGGTCACGCCC       |                                                                   | 489           |
|                      | trpBA.f             | CGGCGATAAAGACATCTTCAC    |                                                                   |               |
|                      | trpBA.r             | GCAACGCGGCCTGGCGGAAG     |                                                                   |               |

<sup>a</sup> according to the method described by Clermont et al 2013 [33]. <sup>b</sup> used as internal PCR control in reaction for phylogroups C and E

## Reference

- Clermont, O.; Christenson, J.K.; Denamur, E.; Gordon, D.M. The Clermont *Escherichia coli* Phylo-Typing Method Revisited: Improvement of Specificity and Detection of New Phylo-Groups. *Environ. Microbiol. Rep.* **2013**, *5*, 58–65, doi:10.1111/1758-2229.12019.

**Table S2. Primers and conditions used in PCR for amplification of *E. coli* virulence genes**

| Target gene     | Primers (5' – 3')                                                   | Cycle                                                                            | Product size (bp) | Reference |
|-----------------|---------------------------------------------------------------------|----------------------------------------------------------------------------------|-------------------|-----------|
| <i>afaBCIII</i> | F: GCTGGGCAGCAAACCTGATAACTCTC<br>R: CATCAAGCTGTTTGTTCGTCGCCCG       | 94 °C – 5 min; 25 × (94 °C – 2 min; 65 °C – 1 min; 72 °C – 2 min); 72 °C – 8 min | 750               | [94]      |
| <i>afaEVIII</i> | F: CTAACCTTGCCATGCTGTGACAGTA<br>R: TTATCCCCTGCGTAGTTGTGAATC         | 94 °C – 5 min; 25 × (94 °C – 2 min; 65 °C – 1 min; 72 °C – 2 min); 72 °C – 8 min | 302               | [95]      |
| <i>aggR</i>     | F: CGATACATTAAGACGCCTAAAG<br>R: TCTGATACATTAAATTCATCTGC             | 94 °C – 5 min; 30 × (94 °C – 1 min; 56 °C – 1 min; 72 °C – 1 min); 72 °C – 7 min | 346               | [96]      |
| <i>bfpB</i>     | F: GACACCTCATTGCTGAAGTCG<br>R: CCAGAACACCTCCGTTATGC                 | 94 °C – 5 min; 30 × (94 °C – 30 s; 63 °C – 30 s; 72 °C – 90 s); 72 °C – 5 min    | 910               | [96]      |
| <i>bmaE</i>     | F: ATGGCGCTAACTTGCCATGCTG<br>R: AGGGGGACATATAGCCCCCTTC              | 95 °C – 12 min; 25 × (94 °C – 30 s; 63 °C – 30 s; 68 °C – 3 min); 72 °C – 10 min | 507               | [97]      |
| <i>cdtA</i>     | F: TTACTGGTTGCTCGAATGGGGATCGGT<br>R: GACAGGTGGACTTATTGCCCATAGC      | 94 °C – 5 min; 30 × (94 °C – 30 s; 55 °C – 30 s; 72 °C – 1 min); 72 °C – 5 min   | 575               | [98]      |
| <i>cf29A</i>    | F: TCAACAACACTATCAAGGAA<br>R: ACCAAGTGCGTAAGAGGA                    | 94 °C – 1 min; 30 × (94 °C – 30 s; 48 °C – 1 min; 72 °C – 90 s); 72 °C – 7 min   | 572               | [99]      |
| <i>chuA</i>     | F: ATGGTACCGGACGAACCAAC<br>R: TGCCGCCAGTACCAAGACA                   | 94 °C – 4 min; 30 × (94 °C – 5 s; 59 °C – 20 s); 72 °C – 5 min                   | 288               | [33]      |
| <i>cvaC</i>     | F: CACACACAAACGGGAGCTGTT<br>R: CTTCCCGCAGCATAGTTCCAT                | 95 °C – 12 min; 25 × (94 °C – 30 s; 63 °C – 30 s; 68 °C – 3 min); 72 °C – 10 min | 680               | [97]      |
| <i>daaE</i>     | F: GAACGTTGGTTAATGTGGGGTAA<br>R: TATTCACCGGTTCGGTTATCAGT            | 94 °C – 5 min; 35 × (94 °C – 90 s; 60 °C – 90 s; 72 °C – 90 s); 72 °C – 5 min    | 542               | [100]     |
| <i>eae</i>      | F: CCCGGCACAAGCATAAGCTAA<br>R: ATGACTCATGOCCAGCTCA                  | 95 °C – 5 min; 35 × (94 °C – 1 min; 55 °C – 2 min; 72 °C – 1 min); 72 °C – 7 min | 924               | [101]     |
| <i>elt</i>      | F: GAACAGGAGGTTTCTGCGTTAGGTG<br>R: CTTTCAATGGCTTTTTTTTGGGAGTC       | 94 °C – 5 min; 30 × (94 °C – 30 s; 63 °C – 30 s; 72 °C – 90 s); 72 °C – 5 min    | 655               | [96]      |
| <i>escV</i>     | F: ATTCTGGCTCTCTTCTTTATGGCTG<br>R: CGTCCCTTTTACAAACTTCATCGC         | 94 °C – 5 min; 30 × (94 °C – 30 s; 63 °C – 30 s; 72 °C – 90 s); 72 °C – 5 min    | 544               | [96]      |
| <i>estIa</i>    | F: CCTCTTTTAGYCAGACARCTGAATCASTTG<br>R: CAGGCAGGATTACAACAAAGTTCACAG | 94 °C – 5 min; 30 × (94 °C – 30 s; 63 °C – 30 s; 72 °C – 90 s); 72 °C – 5 min    | 157               | [96]      |
| <i>estIb</i>    | F: TGCTTTTTTACCTTTTCGCTC<br>R: CGGTACAAGCAGGATTACAACAC              | 94 °C – 5 min; 30 × (94 °C – 30 s; 63 °C – 30 s; 72 °C – 90 s); 72 °C – 5 min    | 171               | [96]      |
| <i>fimA</i>     | F: GTTGATCAAACCGTTCAG<br>R: AATAACGCGCCTGGAACG                      | 94 °C – 5 min; 27 × (94 °C – 45 s; 50 °C – 45 s; 72 °C – 1 min); 72 °C – 5 min   | 331               | [102]     |
| <i>fyuA</i>     | F: GTAAACAATCTTCCCGCTCGGCAT<br>R: TGACGATTAAACGAACCGGAAGGGA         | 95 °C – 15 min; 30 × (94 °C – 30 s; 63 °C – 90 s; 72 °C – 90 s); 72 °C – 10 min  | 850               | [35]      |

|                 |                                                                    |                                                                                   |      |       |
|-----------------|--------------------------------------------------------------------|-----------------------------------------------------------------------------------|------|-------|
| <i>hlyA</i>     | F: AACAAAGGATAAGCACTGTTCTGGCT<br>R: ACCATATAAGCGGTCATTCCCGTCA      | 94 °C – 5 min; 30 × (94 °C – 1 min; 63 °C – 30 s; 72 °C – 3 min); 72 °C – 10 min  | 1177 | [103] |
| <i>hra</i>      | F: TCACTTGACAGACCAGCGTTTC<br>R: GTAACACACTGCTGTACCT                | 94 °C – 3 min; 25 × (94 °C – 30 s; 58 °C – 30 s; 68 °C – 3 min); 72 °C – 10 min   | 537  | [104] |
| <i>iha</i>      | F: CAGGTCGGGGTTACCAAGT<br>R: CAAATGGCTCTCTCCGTCATGC                | 94 °C – 5 min; 30 × (94 °C – 1 min; 59 °C – 1 min; 72 °C – 1 min); 72 °C – 7 min  | 925  | [105] |
| <i>invE</i>     | F: CGATAGATGGCGAGAAATTATATCCCG<br>R: CGATCAAGAATCCCTAACAGAAGAATCAC | 94 °C – 5 min; 30 × (94 °C – 30 s; 63 °C – 30 s; 72 °C – 90 s); 72 °C – 5 min     | 766  | [96]  |
| <i>ireA</i>     | F: ATTGCCGTGATGTGTTCTGC<br>R: CACGGATCACTTCAATGCGT                 | 94 °C – 3 min; 25 × (94 °C – 30 s; 58 °C – 30 s; 68 °C – 3 min); 72 °C – 10 min   | 384  | [104] |
| <i>iroN</i>     | F: AAGTCAAAGCAGGGTTGCCCG<br>R: GACGCCGACATTAAGACGCAG               | 95 °C – 12 min; 25 × (94 °C – 30 s; 63 °C – 30 s; 68 °C – 3 min); 72 °C – 10 min  | 665  | [106] |
| <i>kpsMTIII</i> | F: TCCTCTTGCTACTATTCCCCCT<br>R: AGGCGTATCCATCCCTCCTAAC             | 95 °C – 12 min; 25 × (94 °C – 30 s; 63 °C – 30 s; 68 °C – 3 min); 72 °C – 10 min  | 392  | [97]  |
| <i>kpsMTII</i>  | F: GCGCATTTGCTGATACTGTTG<br>R: CATCCAGACGATAAGCATGAGCA             | 95 °C – 12 min; 25 × (94 °C – 30 s; 63 °C – 30 s; 68 °C – 3 min); 72 °C – 10 min  | 272  | [97]  |
| <i>mat</i>      | F: TATACGCTGGACTGAGTCGTG<br>R: CAGGTAGCGTCGAACTGTA                 | 94 °C – 3 min; 25 × (94 °C – 30 s; 58 °C – 30 s; 68 °C – 3 min); 72 °C – 10 min   | 899  | [104] |
| <i>ompA</i>     | F: AGCTATCGCGATTGCAGTG<br>R: GGTGTTGCCAGTAACCGG                    | 94 °C – 3 min; 25 × (94 °C – 30 s; 58 °C – 30 s; 68 °C – 3 min); 72 °C – 10 min   | 919  | [104] |
| <i>ompT</i>     | F: ATCTAGCCGAAGAAGGAGGC<br>R: CCCGGGTCATAGTGTTATC                  | 95 °C – 12 min; 25 × (94 °C – 30 s; 63 °C – 30 s; 68 °C – 3 min); 72 °C – 10 min  | 559  | [107] |
| <i>papC</i>     | F: GACGGCTGTACTGCAGGGTGTGGCG<br>R: ATATCCTTTCTGCAGGGATGCAATA       | 94 °C – 5 min; 25 × (94 °C – 2 min; 65 °C – 1 min; 72 °C – 2 min); 72 °C – 8 min  | 328  | [94]  |
| <i>pet</i>      | F: GTGTTTCAACCAGGTTCAACA<br>R: CCTTCACCAATTTATGCAGT                | 95 °C – 15 min; 30 × (94 °C – 1 min; 52 °C – 1 min; 72 °C – 90 s); 72 °C – 10 min | 1037 | [108] |
| <i>pic</i>      | F: AGCCGTTTCCGCAGAAGCC<br>R: AAATGTCAGTGAACCGACGATTGG              | 94 °C – 5 min 30 × (94 °C – 30 s; 63 °C – 30 s; 72 °C – 1,5 min); 72 °C – 5 min   | 1111 | [96]  |
| <i>saa</i>      | F: CGTGATGAACAGGCTATTGC<br>R: ATGGACATGCCTGTGGCAAC                 | 94 °C – 5 min; 30 × (94 °C – 30 s; 55 °C – 30 s; 72 °C – 30 s); 72 °C – 5 min     | 119  | [109] |
| <i>sat</i>      | F: TGCTGGCTCTGGAGGAAC<br>R: TTGAACATTACAGTACCGGG                   | 94 °C – 3 min; 25 × (94 °C – 30 s; 58 °C – 30 s; 68 °C – 3 min); 72 °C – 10 min   | 667  | [104] |
| <i>sfaDE</i>    | F: CGGAGGAGTAATTACAAACCTGGCA<br>R: CTCCGGAGAAGTGGGTGCATCTTAC       | 94 °C – 5 min; 25 × (94 °C – 2 min; 65 °C – 1 min; 72 °C – 2 min); 72 °C – 8 min  | 410  | [94]  |
| <i>shf</i>      | F: ACTTTCTCCCGAGACATTC<br>R: CTTTAGCGGGAGCATTCAT                   | 94 °C – 3 min; 25 × (94 °C – 30 s; 58 °C – 30 s; 68 °C – 3 min); 72 °C – 10 min   | 613  | [110] |
| <i>sitA</i>     | F: AGGGGGCACAACGATTCTCG<br>R: TACCGGGCCGTTTTCTGTGC                 | 94 °C – 5 min; 30 × (94 °C – 30 s; 59 °C – 30 s; 72 °C – 3 min); 72 °C – 10 min   | 608  | [111] |

|             |                                                               |                                                                                     |      |       |
|-------------|---------------------------------------------------------------|-------------------------------------------------------------------------------------|------|-------|
| <i>stx1</i> | F: CGATGTTACGGTTTGTACTGTGACAGC<br>R: AATGCCACGCTTCCCAGAATTG   | 94 °C – 5 min; 30 × (94 °C – 30 s; 63 °C – 30 s; 72 °C – 90 s);<br>72 °C – 5min     | 244  | [96]  |
| <i>stx2</i> | F: GTTTTGACCATCTTCGTCTGATTATTGAG<br>R: AGCGTAAGGCTTCTGCTGTGAC | 94 °C – 5 min; 30 × (94 °C – 30 s; 63 °C – 30 s; 72 °C – 90 s);<br>72 °C – 5 min    | 324  | [96]  |
| <i>traT</i> | F: GGTGTGGTGCGATGAGCACAG<br>R: CACGGTTCAGCCATCCCTGAG          | 95 °C – 12 min; 25 × (94 °C – 30 s; 63 °C – 30 s; 68 °C – 3<br>min); 72 °C – 10 min | 290  | [97]  |
| <i>tsh</i>  | F: GGTGGTGCCTGGAGTGG<br>R: AGTCCAGCGTGATAGTGG                 | 94 °C – 3 min; 25 × (94 °C – 30 s; 58 °C – 30 s; 68 °C – 3 min);<br>72 °C – 10 min  | 620  | [112] |
| <i>vat</i>  | F: TCAGGACACGTTCAGGCATTTCAGT<br>R: GGCCAGAACATTTGCTCCCTTGTT   | 95 °C –15 min; 30 × (94 °C – 30 s; 63 °C – 90 s; 72 °C – 90 s);<br>72 °C – 10 min   | 1100 | [35]  |
| <i>yfcV</i> | F: ACATGGAGACCACGTTTACC<br>R: GTAATCTGGAATGTGGTCAGG           | 95 °C –15 min; 30 × (94 °C – 30 s; 63 °C – 90 s; 72 °C – 90 s);<br>72 °C – 10 min   | 292  | [35]  |

## References

33. Clermont, O.; Christenson, J.K.; Denamur, E.; Gordon, D.M. The Clermont *Escherichia coli* Phylo-Typing Method Revisited: Improvement of Specificity and Detection of New Phylo-Groups. *Environ. Microbiol. Rep.* **2013**, *5*, 58–65. <https://doi.org/10.1111/1758-2229.12019>.
35. Spurbeck, R.R.; Dinh, P.C.; Walk, S.T.; Stapleton, A.E.; Hooton, T.M.; Nolan, L.K.; Kim, K.S.; Johnson, J.R.; Mobley, H.L.T. *Escherichia coli* Isolates That Carry *vat*, *fyuA*, *chuA*, and *yfcV* Efficiently Colonize the Urinary Tract. *Infect. Immun.* **2012**, *80*, 4115–4122. <https://doi.org/10.1128/IAI.00752-12>.
94. Le Bouguenec, C.; Archambaud, M.; Labigne, A. Rapid and specific detection of the *pap*, *afa*, and *sfa* adhesin-encoding operons in uropathogenic *Escherichia coli* strains by polymerase chain reaction. *J. Clin. Microbiol.* **1992**, *5*, 1189–1193. doi: 10.1128/jcm.30.5.1189-1193.1992.
95. Lalioui, L.; Le Bouguenec, C. afa-8 Gene cluster is carried by a pathogenicity island inserted into the tRNA(Phe) of human and bovine pathogenic *Escherichia coli* isolates. *Infect. Immun.* **2001**, *69*, 937–948. doi: 10.1128/IAI.69.2.937-948.2001.
96. Müller, D.; Greune, L.; Heusipp, G.; Karch, H.; Fruth, A.; Tschäpe, H.; Schmidt, M.A. Identification of unconventional intestinal pathogenic *Escherichia coli* isolates expressing intermediate virulence factor profiles by using a novel single-step multiplex PCR. *Appl. Environ. Microbiol.* **2007**, *73*, 3380–3390. doi: 10.1128/AEM.02855-06.
97. Johnson, J.R.; Stell, A.L. Extended virulence genotypes of *Escherichia coli* strains from patients with urosepsis in relation to phylogeny and host compromise. *J. Infect. Dis.* **2000**, *181*, 261–272. doi: 10.1086/315217.
98. Okuda, J.; Kurazono, H.; Takeda, Y. Distribution of the cytolethal distending toxin A gene (*cdtA*) among species of *Shigella* and *Vibrio*, and cloning and sequencing of the *cdt* gene from *Shigella dysenteriae*. *Microb. Pathog.* **1995**, *18*, 167–172. doi: 10.1016/s0882-4010(95)90022-5.
99. Santos, A.C.; Zidko, A.C.; Pignatari, A.C.; Silva, R.M. Assessing the diversity of the virulence potential of *Escherichia coli* isolated from bacteremia in São Paulo, Brazil. *Braz. J. Med. Biol. Res.* **2013**, *46*, 968–973. doi: 10.1590/1414-431X20133184. Epub 2013 Oct 15.
100. Vidal, M.; Kruger, E.; Durán, C.; Lagos, R.; Levine, M.; Prado, V.; Toro, C.; Vidal R. Single multiplex PCR assay to identify simultaneously the six categories of diarrheagenic *Escherichia coli* associated with enteric infections. *J. Clin. Microbiol.* **2005**, *43*, 5362–5365. doi: 10.1128/JCM.43.10.5362-5365.2005.
101. Gannon, V.P.; Rashed, M.; King, R.K.; Thomas, E.J. Detection and characterization of the *eae* gene of Shiga-like toxin-producing *Escherichia coli* using polymerase chain reaction. *J. Clin. Microbiol.* **1993**, *31*, 1268–1274. doi: 10.1128/jcm.31.5.1268-1274.1993.
102. Marc, D.; Dho-Moulin, M. Analysis of the *fim* cluster of an avian O2 strain of *Escherichia coli*: serogroup-specific sites within *fimA* and nucleotide sequence of *fimL*. *J. Med. Microbiol.* **1996**, *44*, 444–452. doi: 10.1099/00222615-44-6-444.
103. Yamamoto, S.; Terai, A.; Yuri, K.; Kurazono, H.; Takeda, Y.; Yoshida, O. Detection of urovirulence factors in *Escherichia coli* by multiplex polymerase chain reaction. *FEMS Immunol. Med. Microbiol.* **1995**, *12*, 85–90. doi: 10.1111/j.1574-695X.1995.tb00179.x.
104. Ewers, C.; Li, G.; Wilking, H.; Kiessling, S.; Alt, K.; Antão, E.M.; Laturus, C.; Diehl, I.; Glodde, S.; Homeier, T., et al. Avian pathogenic, uropathogenic, and newborn meningitis-causing *Escherichia coli*: how closely related are they? *Int. J. Med. Microbiol.* **2007**, *297*, 163–176. doi: 10.1016/j.ijmm.2007.01.003.

105. Szalo, I.M.; Goffaux, F.; Pirson, V.; Piérard, D.; Ball, H.; Mainil, J. Presence in bovine enteropathogenic (EPEC) and enterohaemorrhagic (EHEC) *Escherichia coli* of genes encoding for putative adhesins of human EHEC strains. *Res. Microbiol.* **2002**, *153*, 653–658. doi: 10.1016/s0923-2508(02)01379-7.
106. Johnson, J.R.; Russo, T.A.; Tarr, P.I.; Carlino, U.; Bilge, S.S.; Vary, J.C.Jr.; Stell, A.L. Molecular epidemiological and phylogenetic associations of two novel putative virulence genes, *iha* and *iroN* (*E. coli*), among *Escherichia coli* isolates from patients with urosepsis. *Infect. Immun.* **2000**, *68*, 3040–3047. doi: 10.1128/IAI.68.5.3040-3047.2000.
107. Johnson, J.R.; O'Bryan, T.T.; Low, D.A.; Ling, G.; Delavari, P.; Fasching, C.; Russo, T.A.; Carlino, U.; Stell, A.L. Evidence of commonality between canine and human extraintestinal pathogenic *Escherichia coli* strains that express *papG* allele III. *Infect. Immun.* **2000**, *68*, 3327–3336. doi: 10.1128/IAI.68.6.3327-3336.2000.
108. Gioppo, N.M.; Elias, W.P.Jr; Vidotto, M.C.; Linhares, R.E.; Saridakis, H.O.; Gomes, T.A.; Trabulsi, L.R.; Pelayo, J.S. Prevalence of HEp-2 cell-adherent *Escherichia coli* and characterisation of enteroaggregative *E. coli* and chain-like adherent *E. coli* isolated from children with and without diarrhoea, in Londrina, Brazil. *FEMS Microbiol. Lett.* **2000**, *190*, 293–298. doi: 10.1111/j.1574-6968.2000.tb09301.x.
109. Paton, A.W.; Paton, J.C. Direct detection and characterization of Shiga toxigenic *Escherichia coli* by multiplex PCR for *stx1*, *stx2*, *eae*, *ehxA*, and *saa*. *J. Clin. Microbiol.* **2002**, *40*, 271–274. doi:10.1128/JCM.40.1.271-274.2002
110. Czeizulin, J.R.; Whittam, T.S.; Henderson, I.R.; Navarro-Garcia, F.; Nataro, J.P. Phylogenetic analysis of enteroaggregative and diffusely adherent *Escherichia coli*. *Infect. Immun.* **1999** *67*(6):2692-9. doi: 10.1128/IAI.67.6.2692-2699.1999.
111. Rodriguez-Siek, K.E.; Giddings, C.W.; Doetkott, C.; Johnson, T.J.; Nolan, L.K. Characterizing the APEC pathotype. *Vet. Res.* **2005**, *36*, 241–256. doi: 10.1051/vetres:2004057.
112. Delicato, E.R.; de Brito, B.G.; Konopatzki, A.P.; Gaziri, L.C.; Vidotto, M.C. Occurrence of the temperature-sensitive hemagglutinin among avian *Escherichia coli*. *Avian Dis.* **2002**, *46*, 713–716. doi: 10.1637/0005-2086(2002)046[0713:OOTTSH]2.0.CO;2.

**Table S3. Virulence profile, phylogenetic origin, and characterization of intrinsic virulence and uropathogenic potential of strains isolated from urine in the Mogi Guaçu community**

| Strains <sup>a</sup> | Virulence profile <sup>b</sup>                                                                                 | Phylogroup <sup>c</sup> | ExPEC+ <sup>d</sup> | UPEC+ <sup>d</sup> |
|----------------------|----------------------------------------------------------------------------------------------------------------|-------------------------|---------------------|--------------------|
| LSC 001              | <i>fimA, ompT, ompA, hra, sitA, mat, kpsMTIII, saa, cdtA, iroN, papC, kpsMTII, vat, fyuA, yfcV, chuA</i>       | B2                      | +                   | +                  |
| LSC 002              | <i>fimA, ompT, ompA, hra, sitA, sat, iha, mat, ireA, traT, iucD, fyuA, yfcV, chuA</i>                          | B2                      | -                   | -                  |
| LSC 003              | <i>fimA, ompT, ompA, hra, sitA, kpsMTIII, mat, ireA, iroN, traT, papC, vat, fyuA, yfcV, chuA</i>               | B2                      | -                   | +                  |
| LSC 004              | <i>fimA, ompT, ompA, hra, sitA, sat, iha, mat, ireA, saa, iroN, papC, kpsMTII, iucD, vat, fyuA, yfcV, chuA</i> | B2                      | +                   | +                  |
| LSC 005              | <i>fimA, ompA, ompT, sitA, mat, traT, chuA</i>                                                                 | E                       | -                   | -                  |
| LSC 006              | <i>fimA, ompA, ompT, mat</i>                                                                                   | A                       | -                   | -                  |
| LSC 007              | <i>fimA, ompA, shf, ireA, traT, fyuA</i>                                                                       | A                       | -                   | -                  |
| LSC 008              | <i>fimA, ompA, ompT, mat</i>                                                                                   | A                       | -                   | -                  |
| LSC 009              | <i>fimA, ompA, hra, sitA, mat, tsh, ireA, saa, iroN, traT, iucD, vat, fyuA, yfcV, chuA</i>                     | B2                      | -                   | +                  |
| LSC 010              | <i>fimA, ompA, ompT, cvaC, sitA, mat, saa, pet, kpsMTII, vat, fyuA, yfcV, chuA</i>                             | NC <sup>e</sup>         | -                   | +                  |
| LSC 011              | <i>fimA, ompA, hra, ompT, sitA, sat, iha, mat, pet, traT, iucD, fyuA, yfcV, chuA</i>                           | B2                      | -                   | -                  |
| LSC 012              | <i>fimA, ompA, sitA, sat, iha, saa, pet, daaE, traT, sfaDE, iucD, fyuA, yfcV, chuA</i>                         | B2                      | +                   | -                  |
| LSC 013              | <i>fimA, ompA, ompT, sitA, sat, iha, mat, ireA, pet, traT, iucD, fyuA, yfcV, chuA</i>                          | B2                      | -                   | -                  |
| LSC 014              | <i>fimA, ompA, hra, ompT, sitA, sat, iha, pic, ireA, saa, pet, iroN, papC, iucD, chuA</i>                      | B2                      | +                   | -                  |
| LSC 015              | <i>fimA, ompA, traT, kpsMTII</i>                                                                               | A                       | -                   | -                  |
| LSC 016              | <i>fimA, ompA, sitA, traT</i>                                                                                  | A                       | -                   | -                  |
| LSC 017              | <i>fimA, ompA, hra, ompT, sitA, saa, iroN, traT, papC, chuA</i>                                                | B2                      | -                   | -                  |
| LSC 018              | <i>fimA, ompA, ompT, sitA, pic, chuA</i>                                                                       | B2                      | -                   | -                  |
| LSC 019              | <i>fimA, mat</i>                                                                                               | A                       | -                   | -                  |
| LSC 020              | <i>fimA, ompT, sitA, pic, iroN, traT, papC, kpsMTII, vat, fyuA, yfcV, chuA</i>                                 | B2                      | +                   | +                  |
| LSC 021              | <i>fimA, sitA, traT</i>                                                                                        | NC                      | -                   | -                  |
| LSC 022              | <i>fimA, sitA, iucD, fyuA</i>                                                                                  | A                       | -                   | -                  |
| LSC 023              | <i>fimA, ompT, sitA, iroN, traT, iucD, vat, fyuA, chuA</i>                                                     | NC                      | -                   | -                  |
| LSC 024              | <i>fimA</i>                                                                                                    | C                       | -                   | -                  |
| LSC 025              | <i>fimA, kpsMTII, chuA</i>                                                                                     | D                       | -                   | -                  |
| LSC 026              | <i>fimA, ompT, sitA, sat, iha, ireA, iroN, traT, kpsMTII, vat, fyuA, yfcV, chuA</i>                            | B2                      | -                   | +                  |
| LSC 027              | <i>fimA, sitA, shf</i>                                                                                         | C                       | -                   | -                  |

**Table S3. Virulence profile, phylogenetic origin, and characterization of intrinsic virulence and uropathogenic potential of strains isolated from urine in the Mogi Guaçu community. Continued**

| Strains <sup>a</sup> | Virulence profile <sup>b</sup>                                                                            | Phylogroup <sup>c</sup> | ExPEC+ <sup>d</sup> | UPEC+ <sup>d</sup> |
|----------------------|-----------------------------------------------------------------------------------------------------------|-------------------------|---------------------|--------------------|
| LSC 028              | <i>fimA, ompT, ompA, sitA, pic, shf, saa, traT, vat, fyuA, yfcV, chuA</i>                                 | B2                      | -                   | +                  |
| LSC 029              | <i>fimA, ompT, ompA, iroN, traT, iucD</i>                                                                 | B1                      | -                   | -                  |
| LSC 030              | <i>fimA, ompA, hra, sitA, iroN, traT</i>                                                                  | B1                      | -                   | -                  |
| LSC 031              | <i>fimA, ompT, ompA, saa, pet, traT, vat, fyuA, yfcV, chuA</i>                                            | B2                      | -                   | +                  |
| LSC 032              | <i>fimA, ompT, ompA, hra, sitA, sat, iha, traT, chuA</i>                                                  | E                       | -                   | -                  |
| LSC 033              | <i>fimA, ompT, ompA, hra, sitA, saa, traT, papC, kpsMTII, sfaDE, iucD, vat, fyuA, yfcV, chuA</i>          | B2                      | +                   | +                  |
| LSC 034              | <i>fimA, ompT, ompA, pet, iroN, kpsMTII, vat, fyuA, yfcV, chuA</i>                                        | B2                      | -                   | +                  |
| LSC 036              | <i>fimA, saa, sitA, ompT, iroN, traT, papC, sfaDE, kpsMTII, vat, fyuA, yfcV, chuA</i>                     | B2                      | +                   | +                  |
| LSC 037              | <i>fimA, ompA, chuA</i>                                                                                   | B2                      | -                   | -                  |
| LSC 038              | <i>fimA, sitA, ompT, papC, kpsMTII, fyuA, chuA</i>                                                        | D                       | +                   | -                  |
| LSC 039              | <i>fimA, shf, ompA, traT, papC, iucD</i>                                                                  | B1                      | +                   | -                  |
| LSC 040              | <i>fimA, sitA, cvaC, ompA, iroN, traT, fyuA</i>                                                           | B1                      | -                   | -                  |
| LSC 041              | <i>fimA, ompT, ompA, sfaDE, chuA</i>                                                                      | F                       | -                   | -                  |
| LSC 042              | <i>fimA, sitA, cvaC, ompA, iroN, traT</i>                                                                 | C                       | -                   | -                  |
| LSC 043              | <i>fimA, sitA, ompT, ompA, iroN, papC, sfaDE, kpsMTII, vat, fyuA, yfcV, chuA</i>                          | B2                      | +                   | +                  |
| LSC 044              | <i>fimA, shf, sitA, sat, iha, ompT, ompA, kpsMTII, vat, fyuA, yfcV, chuA</i>                              | B2                      | -                   | +                  |
| LSC 045              | <i>fimA, saa, cdtA, sitA, sat, iha, ompT, ompA, hra, traT, papC, iucD, kpsMTII, vat, fyuA, yfcV, chuA</i> | B2                      | +                   | +                  |
| LSC 046              | <i>fimA, ompA, traT, papC, fyuA</i>                                                                       | A                       | -                   | -                  |
| LSC 047              | <i>fimA, sitA, ompA, hra, iroN, traT, ompT, sfaDE, kpsMTII, vat, fyuA, yfcV, chuA</i>                     | B2                      | +                   | +                  |
| LSC 048              | <i>fimA, ompA</i>                                                                                         | A                       | -                   | -                  |
| LSC 049              | <i>fimA, saa, sitA, cvaC, ompT, ompA, iroN, traT, papC, kpsMTII, vat, fyuA, yfcV, chuA</i>                | B2                      | +                   | +                  |
| LSC 050              | <i>fimA, sitA, iroN, traT, ompT, papC, sfaDE, kpsMTII, vat, fyuA, yfcV, chuA</i>                          | B2                      | +                   | +                  |
| LSC 051              | <i>fimA, shf, sitA, traT</i>                                                                              | A                       | -                   | -                  |
| LSC 052              | <i>fimA, ompA, sitA, traT, aggR, kpsMTII, chuA</i>                                                        | D                       | -                   | -                  |
| LSC 053              | <i>fimA, ompA, hra, sitA, iroN, traT, ompT, cvaC, iucD, kpsMTII, vat, fyuA, yfcV, chuA</i>                | B2                      | +                   | +                  |
| LSC 054              | <i>fimA, ompA, hra, sitA, saa, iroN, traT, ompT, sfaDE, kpsMTII, vat, fyuA, yfcV, chuA</i>                | B2                      | +                   | +                  |
| LSC 055              | <i>fimA, ompA, hra, sitA, iroN, traT, iucD</i>                                                            | A                       | -                   | -                  |

**Table S3. Virulence profile, phylogenetic origin, and characterization of intrinsic virulence and uropathogenic potential of strains isolated from urine in the Mogi Guaçu community. Continued**

| Strains <sup>a</sup> | Virulence profile <sup>b</sup>                                                             | Phylogroup <sup>c</sup> | ExPEC+ <sup>d</sup> | UPEC+ <sup>d</sup> |
|----------------------|--------------------------------------------------------------------------------------------|-------------------------|---------------------|--------------------|
| LSC 056              | <i>fimA, ompA, hra, sitA, sat, traT, ompT, papC, iucD, kpsMTII, fyuA, yfcV, chuA</i>       | B2                      | +                   | -                  |
| LSC 057              | <i>fimA, ompA, hra, sitA, sat, traT, ompT, papC, iucD, kpsMTII, fyuA, yfcV, chuA</i>       | B2                      | +                   | -                  |
| LSC 058              | <i>fimA, ompA, sitA, sat, hlyA, ompT, iucD, kpsMTII, fyuA, yfcV, chuA</i>                  | B2                      | +                   | -                  |
| LSC 059              | <i>fimA, ompA, hra, sitA, iroN, traT, cvaC, papC, iucD, kpsMTII, vat, fyuA, yfcV, chuA</i> | B2                      | +                   | +                  |
| LSC 060              | <i>fimA, ompA, hra, ompT, vat, fyuA, yfcV, chuA</i>                                        | B2                      | -                   | +                  |
| LSC 061              | <i>fimA, ompA, traT</i>                                                                    | A                       | -                   | -                  |
| LSC 062              | <i>fimA, ompA, hra, hlyA, ompT, sfaDE, kpsMTII, chuA</i>                                   | B2                      | +                   | -                  |
| LSC 063              | <i>fimA, ompA, sitA, ompT, papC, iucD</i>                                                  | C                       | +                   | -                  |
| LSC 064              | <i>fimA, ompA, hra,</i>                                                                    | A                       | -                   | -                  |
| LSC 065              | <i>fimA, ompA, sitA, sat, traT, ompT, papC, iucD, kpsMTII, chuA</i>                        | B2                      | +                   | -                  |
| LSC 066              | <i>fimA, ompA, hra, traT</i>                                                               | A                       | -                   | -                  |
| LSC 067              | <i>fimA, ompA, sitA, sat, saa, ompT, papC, kpsMTII, chuA</i>                               | B2                      | +                   | -                  |
| LSC 068              | <i>fimA, ompA, saa, ompT, chuA</i>                                                         | F                       | -                   | -                  |
| LSC 069              | <i>fimA, ompA, sitA, sat, iroN, traT, hlyA, ompT, sfaDE, kpsMTII, chuA</i>                 | B2                      | +                   | -                  |
| LSC 070              | <i>fimA, ompA, iroN, traT, cvaC, papC, iucD, kpsMTII, fyuA, yfcV, chuA</i>                 | B2                      | +                   | -                  |
| LSC 071              | <i>fimA, ompA, ompT</i>                                                                    | A                       | -                   | -                  |
| LSC 072              | <i>fimA, ompA, hra, chuA</i>                                                               | B2                      | -                   | -                  |
| LSC 073              | <i>fimA, ompA, ompT, eae, escV, vat, fyuA, yfcV, chuA</i>                                  | B2                      | -                   | +                  |
| LSC 074              | <i>fimA, ompA, iroN, traT, ompT, sfaDE</i>                                                 | B1                      | -                   | -                  |
| LSC 075              | <i>fimA, ompA, iroN, traT, ompT, papC, sfaDE, kpsMTII, chuA</i>                            | B2                      | +                   | -                  |
| LSC 076              | <i>fimA, ompA, hra, shf, fyuA, yfcV</i>                                                    | B1                      | -                   | -                  |
| LSC 077              | <i>fimA, ompA, traT, ompT, chuA</i>                                                        | B2                      | -                   | -                  |
| LSC 078              | <i>fimA, ompA, cdtA, kpsMTII, fyuA, yfcV</i>                                               | B1                      | -                   | -                  |
| LSC 079              | <i>fimA, iroN, traT, hlyA, ompT, sfaDE, kpsMTII, fyuA, chuA</i>                            | B2                      | +                   | -                  |
| LSC 080              | <i>fimA, mat, hlyA, ompT, fyuA, yfcV</i>                                                   | C                       | -                   | -                  |
| LSC 081              | <i>fimA, mat, daaE, traT, ompT, papC, kpsMTII, chuA</i>                                    | D                       | +                   | -                  |
| LSC 082              | <i>fimA, mat, ompA, hra, ompT, kpsMTII, fyuA, chuA</i>                                     | F                       | -                   | -                  |



**Table S3. Virulence profile, phylogenetic origin, and characterization of intrinsic virulence and uropathogenic potential of strains isolated from urine in the Mogi Guaçu community. Continued**

| Strains <sup>a</sup> | Virulence profile <sup>b</sup>                                                                            | Phylogroup <sup>c</sup> | ExPEC+ <sup>d</sup> | UPEC+ <sup>d</sup> |
|----------------------|-----------------------------------------------------------------------------------------------------------|-------------------------|---------------------|--------------------|
| LSC 083              | <i>fimA, saa, pet, ompA, hra, hlyA, traT, ompT, papC, kpsMTII, chuA</i>                                   | B2                      | +                   | -                  |
| LSC 084              | <i>fimA, mat, ompA, iroN, ompT, fyuA, yfcV, chuA</i>                                                      | B2                      | -                   | -                  |
| LSC 085              | <i>fimA, mat, traT, ompT, papC, iucD, kpsMTII, fyuA, yfcV, chuA</i>                                       | E                       | +                   | -                  |
| LSC 087              | <i>fimA, mat, ompA, hra, traT, ompT, kpsMTII, fyuA, chuA</i>                                              | E                       | -                   | -                  |
| LSC 088              | <i>fimA, mat, traT, papC, fyuA</i>                                                                        | A                       | -                   | -                  |
| LSC 089              | <i>fimA, saa, mat, pet, cdtA, ompA, hra, hlyA, iroN, traT, ompT, papC, kpsMTII, fyuA, chuA</i>            | B2                      | +                   | -                  |
| LSC 090              | <i>fimA, mat, ompA, ompT, vat, fyuA, yfcV</i>                                                             | C                       | -                   | -                  |
| LSC 091              | <i>fimA, mat, ompA, hra, papC, iucD</i>                                                                   | C                       | +                   | -                  |
| LSC 092              | <i>fimA, ompA, hra, papC, fyuA</i>                                                                        | C                       | -                   | -                  |
| LSC 093              | <i>fimA, saa, iroN, hlyA, pet, ompA, ompT, sfaDE, kpsMTII, fyuA, chuA</i>                                 | B2                      | +                   | -                  |
| LSC 094              | <i>fimA, traT, shf, ompA, vat, fyuA, yfcV</i>                                                             | B1                      | -                   | -                  |
| LSC 096              | <i>fimA, fyuA</i>                                                                                         | A                       | -                   | -                  |
| LSC 097              | <i>fimA, saa, iroN, hlyA, ompA, sfaDE, chuA</i>                                                           | B2                      | -                   | -                  |
| LSC 098              | <i>tratT, ompA, vat, fyuA, yfcV</i>                                                                       | A                       | -                   | -                  |
| LSC 099              | <i>fimA, saa, ompA, hra</i>                                                                               | B1                      | -                   | -                  |
| LSC 100              | <i>fimA, saa, iroN, tratT, hlyA, pet, mat ompA, hra, ompT, papC, sfaDE, kpsMTII, chuA</i>                 | B2                      | +                   | -                  |
| LSC 101              | <i>fimA, saa, iroN, hlyA, pet, cdtA, mat ompA, hra, ompT, papC, sfaDE, kpsMTII, vat, fyuA, yfcV, chuA</i> | B2                      | +                   | +                  |
| LSC 102              | <i>fimA, iroN, tratT, hlyA, pet, mat, ompA, hra, papC, sfaDE, vat, fyuA, yfcV, chuA</i>                   | B2                      | +                   | +                  |
| LSC 103              | <i>iroN, tratT, mat, ompA, ompT, kpsMTII, vat, fyuA, yfcV, chuA</i>                                       | B2                      | -                   | +                  |
| LSC 104              | <i>iroN, tratT, hlyA, mat, ompA, hra, ompT, iucD, kpsMTII, vat, fyuA, yfcV, chuA</i>                      | B2                      | +                   | +                  |
| LSC 105              | <i>fimA, tratT, hlyA, pet, mat ompA, hra, ompT, papC, kpsMTII, vat, fyuA, yfcV, chuA</i>                  | B2                      | +                   | +                  |
| LSC 106              | <i>fimA, saa, traT, mat, ompA, ompT, iucD, kpsMTII, fyuA, yfcV</i>                                        | C                       | +                   | -                  |
| LSC 107              | <i>fimA, saa, iroN, tratT, mat, ireA, ompA, papC, sfaDE, chuA</i>                                         | B2                      | +                   | -                  |
| LSC 108              | <i>fimA, iroN, tratT, hlyA, pet, mat, ompA, hra, cvaC, ompT, iucD, kpsMTII, vat, fyuA, yfcV, chuA</i>     | B2                      | +                   | +                  |
| LSC 109              | <i>fimA, iroN, tratT, pet, mat, ompA, ompT, kpsMTII, vat, yfcV, chuA</i>                                  | B2                      | -                   | -                  |
| LSC 110              | <i>shf, mat, ompA, cvaC, ompT, iucD, kpsMTII, fyuA, yfcV</i>                                              | B1                      | +                   | -                  |
| LSC 111              | <i>fimA, iroN, tratT, shf, mat, ompA, hra, cvaC, kpsMTII</i>                                              | B1                      | -                   | -                  |

**Table S3. Virulence profile, phylogenetic origin, and characterization of intrinsic virulence and uropathogenic potential of strains isolated from urine in the Mogi Guaçu community. Continued**

| Strains <sup>a</sup> | Virulence profile <sup>b</sup>                                                                                        | Phylogroup <sup>c</sup> | ExPEC+ <sup>d</sup> | UPEC + <sup>d</sup> |
|----------------------|-----------------------------------------------------------------------------------------------------------------------|-------------------------|---------------------|---------------------|
| LSC 112              | <i>fimA, saa, pet, mat, ireA, ompA, hra, ompT, papC, iucD, kpsMTII, fyuA, chuA</i>                                    | B2                      | +                   | -                   |
| LSC 113              | <i>fimA, mat, vat, fyuA, yfcV</i>                                                                                     | NC                      | -                   | -                   |
| LSC 114              | <i>fimA, iroN, tratT, ompT, mat, ireA, papC, kpsMTII, chuA</i>                                                        | E                       | +                   | -                   |
| LSC 115              | <i>fimA, iroN, pic, ompT, hra, mat, ireA, sfaDE, kpsMTII, chuA</i>                                                    | B2                      | +                   | -                   |
| LSC 116              | <i>fimA, ompT, sitA, mat, iucD, kpsMTII, yfcV, chuA</i>                                                               | B2                      | +                   | -                   |
| LSC 117              | <i>fimA, ompA, mat, yfcV</i>                                                                                          | NC                      | -                   | -                   |
| LSC 118              | <i>fimA, iroN, tratT, pic, ompT, ompA, hra, sitA, mat, sfaDE, kpsMTII, chuA</i>                                       | B2                      | +                   | -                   |
| LSC 119              | <i>fimA, iroN, coaC, ompT, ompA, hra, sitA, mat, papC, sfaDE, iucD, kpsMTII, yfcV, chuA</i>                           | B2                      | +                   | -                   |
| LSC 120              | <i>fimA, ompT, sitA, mat, papC, iucD, yfcV</i>                                                                        | C                       | +                   | -                   |
| LSC 121              | <i>fimA, saa, iroN, traT, ompT, sitA, mat, papC, sfaDE, kpsMTII, chuA</i>                                             | B2                      | +                   | -                   |
| LSC 122              | <i>fimA, sitA, mat, yfcV</i>                                                                                          | A                       | -                   | -                   |
| LSC 123              | <i>fimA, saa, traT, ompT, ompA, sitA, mat, kpsMTII, chuA</i>                                                          | B2                      | -                   | -                   |
| LSC 124              | <i>fimA, ompT, ompA, hra, sitA, sat, iha, mat, papC, iucD, kpsMTII, yfcV, chuA</i>                                    | B2                      | +                   | -                   |
| LSC 126              | <i>iucD, vat, fyuA, yfcV</i>                                                                                          | NC                      | -                   | -                   |
| LSC 127              | <i>fimA, iroN, hlyA, pic, ompT, ompA, hra, sitA, mat, iucD, kpsMTII, chuA</i>                                         | B2                      | +                   | -                   |
| LSC 128              | <i>fimA, saa, iroN, tratT, coaC, ompT, ompA, sitA, mat, ireA, papC, iucD, kpsMTII, fyuA, yfcV, chuA</i>               | B2                      | +                   | -                   |
| LSC 129              | <i>fimA, saa, iroN, hlyA, pic, ompT, hra, sitA, sat, iha, mat, ireA, papC, sfaDE, iucD, kpsMTII, fyuA, yfcV, chuA</i> | B2                      | +                   | -                   |
| LSC 131              | <i>fimA, ompA, mat, papC</i>                                                                                          | A                       | -                   | -                   |
| LSC 132              | <i>fimA, iroN, ompT, ompA, mat, iucD, fyuA</i>                                                                        | B1                      | -                   | -                   |
| LSC 133              | <i>fimA, ompA</i>                                                                                                     | B1                      | -                   | -                   |
| LSC 134              | <i>fimA, ompA, yfcV, chuA</i>                                                                                         | B2                      | -                   | -                   |
| LSC 135              | <i>ompA, mat</i>                                                                                                      | A                       | -                   | -                   |
| LSC 136              | <i>fimA, saa, iroN, hlyA, pic, ompT, ompA, hra, sitA, mat, sfaDE, kpsMTII, fyuA, yfcV, chuA</i>                       | B2                      | +                   | -                   |
| LSC 137              | <i>fimA, saa, ompT, ompA, hra, sitA, mat, papC, sfaDE, kpsMTII, fyuA, yfcV, chuA</i>                                  | B2                      | +                   | -                   |
| LSC 138              | <i>fimA, ompA, hra, sitA, iha, mat, fyuA</i>                                                                          | A                       | -                   | -                   |
| LSC 139              | <i>ompA, mat</i>                                                                                                      | A                       | -                   | -                   |
| LSC 140              | <i>fimA, ompT, ompA, sitA, chuA</i>                                                                                   | F                       | -                   | -                   |

**Table S3. Virulence profile, phylogenetic origin, and characterization of intrinsic virulence and uropathogenic potential of strains isolated from urine in the Mogi Guaçu community. Continued**

| Strains <sup>a</sup> | Virulence profile <sup>b</sup>                                                 | Phylogroup <sup>c</sup> | ExPEC+ <sup>d</sup> | UPEC + <sup>d</sup> |
|----------------------|--------------------------------------------------------------------------------|-------------------------|---------------------|---------------------|
| LSC 141              | <i>fimA, ompT, ompA, sitA, mat, kpsMTII, chuA</i>                              | E                       | -                   | -                   |
| LSC 142              | <i>traT, shf, ompA, sitA, mat, iucD</i>                                        | A                       | -                   | -                   |
| LSC 143              | <i>fimA, ompA, mat</i>                                                         | B1                      | -                   | -                   |
| LSC 144              | <i>fimA, ompT, ompA, sitA, mat, kpsMTII, fyuA, yfcV, chuA</i>                  | B2                      | -                   | -                   |
| LSC 145              | <i>fimA, iroN, traT, cvaC, ompT, ompA, sitA, mat, papC, fyuA</i>               | C                       | -                   | -                   |
| LSC 146              | <i>fimA, saa, ompT, ompA, hra, sitA, mat, kpsMTII, fyuA, yfcV, chuA</i>        | B2                      | -                   | -                   |
| LSC 147              | <i>fimA, iroN, cvaC, ompT, ompA, sitA, sfaDE</i>                               | NC                      | -                   | -                   |
| LSC 148              | <i>fimA, shf, ompT, ompA, sitA, mat, iucD, fyuA</i>                            | B1                      | -                   | -                   |
| LSC 149              | <i>fimA, ompT, ompA, sitA, mat</i>                                             | NC                      | -                   | -                   |
| LSC 150              | <i>fimA, ompT, ompA, sitA, sat, iha, mat, kpsMTII, fyuA, yfcV, chuA</i>        | B2                      | -                   | -                   |
| LSC 152              | <i>fimA, ompT, ompA, mat, kpsMTII, fyuA</i>                                    | NC                      | -                   | -                   |
| LSC 153              | <i>fimA, sitA, sat, ompA</i>                                                   | NC                      | -                   | -                   |
| LSC 154              | <i>fimA, ompA, hra</i>                                                         | NC                      | -                   | -                   |
| LSC 155              | <i>fimA, ompT, ompA, hra, mat, iucD, kpsMTII, vat, fyuA, yfcV, chuA</i>        | B2                      | +                   | +                   |
| LSC 156              | <i>fimA, iroN, ompT, ompA, sitA, mat, fyuA</i>                                 | C                       | -                   | -                   |
| LSC 158              | <i>fimA, iroN, ompT, ompA, sitA, cdtA, mat, kpsMTII, vat, fyuA, yfcV, chuA</i> | B2                      | -                   | +                   |
| LSC 160              | <i>fimA, iroN, ompA, mat, sfaDE, yfcV, chuA</i>                                | B2                      | -                   | -                   |
| LSC 161              | <i>fimA, ompT, ompA, hra, sitA, mat, kpsMTII, fyuA, yfcV, chuA</i>             | B2                      | -                   | -                   |
| LSC 162              | <i>fimA, ompT, ompA, hra, kpsMTII, fyuA, chuA</i>                              | E                       | -                   | -                   |
| LSC 163              | <i>fimA, ompT, ompA, hra, fyuA, yfcV, chuA</i>                                 | F                       | -                   | -                   |
| LSC 164              | <i>ompA, hra</i>                                                               | C                       | -                   | -                   |
| LSC 165              | <i>fimA, iroN, ompT, ompA, hra</i>                                             | B1                      | -                   | -                   |
| LSC 166              | <i>fimA, ompA, hra</i>                                                         | B1                      | -                   | -                   |
| LSC 168              | <i>fimA, ompT, ompA, hra, sitA, iha, papC, kpsMTII, fyuA, yfcV, chuA</i>       | B2                      | +                   | -                   |
| LSC 169              | <i>fimA, saa, ompT, ompA, sitA, iha</i>                                        | B1                      | -                   | -                   |
| LSC 170              | <i>fimA, shf, saa, ompA, hra, kpsMTII, fyuA, chuA</i>                          | E                       | -                   | -                   |
| LSC 171              | <i>fimA, saa, cvaC, ompT, ompA, sitA, sat, iha, fyuA</i>                       | B1                      | -                   | -                   |

**Table S3. Virulence profile, phylogenetic origin, and characterization of intrinsic virulence and uropathogenic potential of strains isolated from urine in the Mogi Guaçu community. Continued**

| Strains <sup>a</sup> | Virulence profile <sup>b</sup>                                                | Phylogroup <sup>c</sup> | ExPEC+ <sup>d</sup> | UPEC+ <sup>d</sup> |
|----------------------|-------------------------------------------------------------------------------|-------------------------|---------------------|--------------------|
| LSC 172              | <i>fimA, shf, saa, ompT, ompA, sitA</i>                                       | B1                      | -                   | -                  |
| LSC 173              | <i>fimA, ompA, sitA, <b>fyuA</b></i>                                          | A                       | -                   | -                  |
| LSC 174              | <i>fimA, ireA, ompA, sitA, <b>fyuA</b>, yfcV</i>                              | NC                      | -                   | -                  |
| LSC 175              | <i>fimA, ompT, ompA, sitA, <b>kpsMTII</b>, <b>fyuA</b></i>                    | A                       | -                   | -                  |
| LSC 176              | <i>fimA, ompA, sitA, sat, iha</i>                                             | A                       | -                   | -                  |
| LSC 178              | <i>fimA, ompT, ompA, sitA, <b>yfcV</b>, <b>chuA</b></i>                       | B2                      | -                   | -                  |
| LSC 180              | <i>fimA, cvaC, ompT, ompA, sitA, <b>kpsMTII</b>, <b>fyuA</b>, <b>chuA</b></i> | E                       | -                   | -                  |
| LSC 182              | <i>fimA, ompT, sitA, iha, <b>kpsMTII</b></i>                                  | NC                      | -                   | -                  |
| <b>LSC 183</b>       | <i><b>fimA, ompA, sitA, eae, escV</b></i>                                     | <b>B1</b>               | -                   | -                  |
| LSC 184              | <i>fimA, ompA, hra, sitA, <b>papC</b></i>                                     | C                       | -                   | -                  |

<sup>a</sup> The hybrid *E. coli* strains identified are shown in red; <sup>b</sup> VFs related to molecular classification into ExPEC+ (at least two among *papC*, *afaBCIII*, *sfaDE*, *iucD*, *kpsMTII*), UPEC+ (simultaneous presence of *vat*, *yfcV*, *chuA*, *fyuA*) or DEC (*aggR*, *eae*, *escV*) are in bold; <sup>c</sup> According to the multiplex PCR described by Clermont et al. 2013; <sup>d</sup> ExPEC+ means intrinsic virulence; UPEC+ means uropathogenic potential; <sup>e</sup> NC – not classified; (+) strains that fulfill the assessed criterium; (-) strains that do not fulfill the assessed criterium.

**Table S4. Frequency of phylogroups and molecular classification markers regarding occurrence of UTI symptoms [n(%)]**

| Traits                                       | ABU (n=36) | UTI (n=94) |
|----------------------------------------------|------------|------------|
| <b>Phylogroups</b>                           |            |            |
| A                                            | 8 (22.2)   | 12 (12.7)  |
| B1                                           | 5 (13.8)   | 12 (12.7)  |
| B2                                           | 13 (36.1)  | 44 (46.8)  |
| C                                            | 4 (11.1)   | 6 (6.3)    |
| D                                            | 0 (0)      | 4 (4.2)    |
| E                                            | 1 (2.7)    | 6 (6.3)    |
| F                                            | 1 (2.7)    | 4 (4.2)    |
| NC                                           | 4 (11.1)   | 5 (5.3)    |
| <b>Molecular classification <sup>a</sup></b> |            |            |
| ExPEC+                                       | 12 (33.3)  | 33 (35.1)  |
| UPEC+                                        | 7 (19.4)   | 16 (17)    |
| DEC                                          | 2 (5.5)    | 1 (1)      |

<sup>a</sup> The molecular classification was performed as follows: intrinsic virulence (ExPEC+), presence of at least two of the genes *papC*, *afaBCIII*, *sfaDE*, *iucD*, and *kpsMTII*; uropathogenic potential (UPEC+), the simultaneous presence of *vat*, *chuA*, *fyuA*, and *yfcV*; DEC, presence of a virulence marker used in the molecular diagnosis of the DEC pathotypes (*cae*, *escV*, *bfpB*, *aggR*, *stx1*, *stx2*, *eltA*, *estA*, and *invE*). ABU – Asymptomatic bacteriuria; UTI – Urinary tract infection. Groups were compared using Fisher Exact test ( $P < 0.05$ ) and no difference was identified. NC, non-classifiable by Clermont method.
